# Supplementary material
Source: publisher figshare collection journal article supplement (https://karger.figshare.com/ndownloader/files/18147617)
Supplement: Supplementary file 1 [file 18147617]

## Demographic Data

Healthy Volunteers (n = 40)

|                                          |                                 |
|------------------------------------------|---------------------------------|
| <b>Age</b> , years [min max]             | 35.51 +/- 10.93 [20 59]         |
| <b>Weight</b> , kg [min max]             | 70.85 +/- 15.41 [50.35 111.13]  |
| <b>Height</b> , cm [min max]             | 170.00 +/- 9.14 [152.40 187.96] |
| <b>BMI</b> , kg/m <sup>2</sup> [min max] | 24.14 +/- 4.31 [18.79 35.90]    |
| <b>MDPQ</b> , score [min max]            | 75.63 +/- 4.69 [64 80]          |
| <b>Gender</b> , male/female              | 19/21                           |
| <b>Handedness</b>                        |                                 |
| left, right, both                        | 3, 34, 3                        |
| <b>Education</b>                         |                                 |
| high school, college, post-grad, n/a     | 2, 11, 26, 1                    |

# Sensor Layout

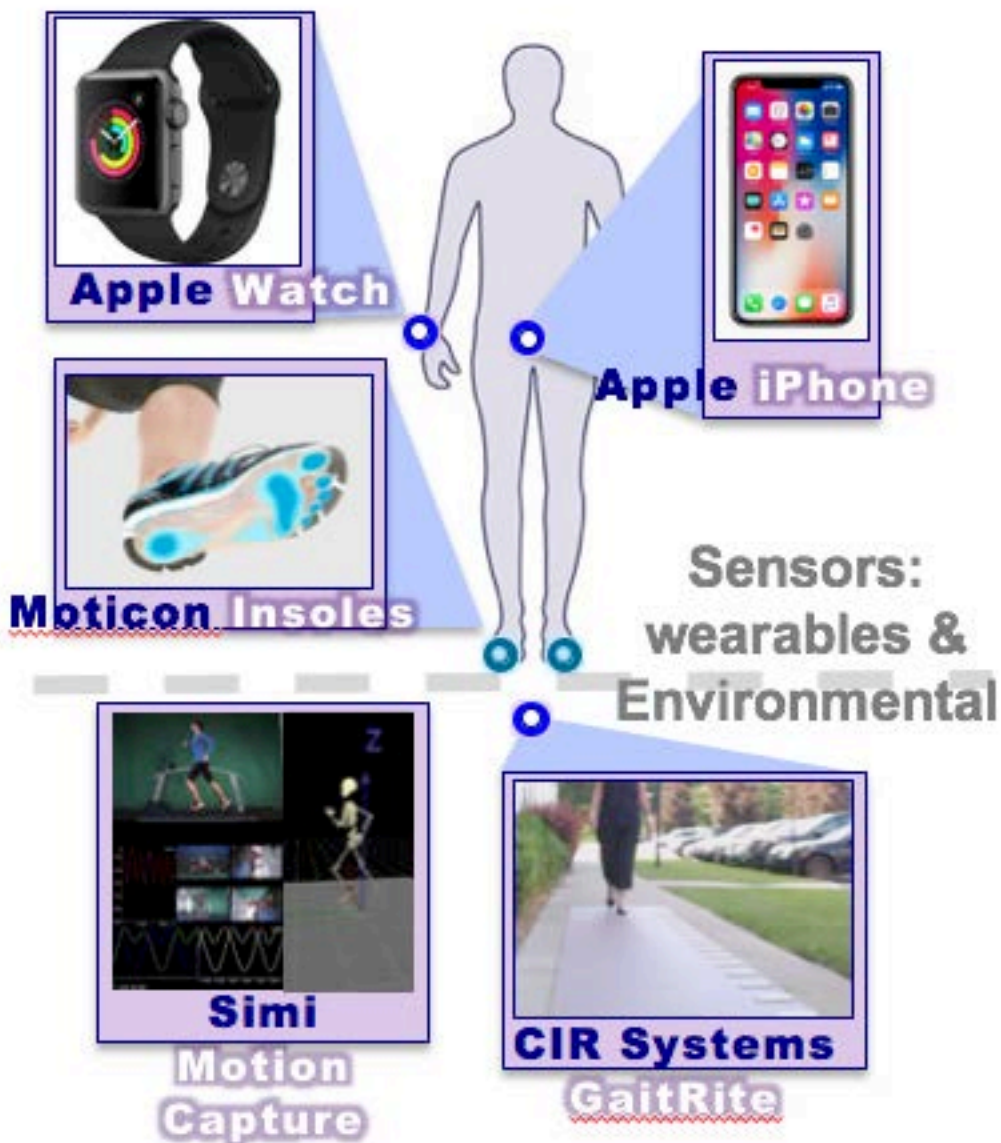

---

## Gait Metric Definitions

---

| <b>Gait Metric</b> | <b>Definition</b>                                                                                                     |
|--------------------|-----------------------------------------------------------------------------------------------------------------------|
| Stride Velocity    | Stride length divided by stride time                                                                                  |
| Stance Time        | Time between the initial contact and the final contact of consecutive footfalls on the same foot                      |
| Step Length        | Distance from the initial contact of current footfall to the initial contact from opposite foot's previous footfall   |
| Stride Length      | Distance between two consecutive footfalls from the same foot                                                         |
| Stride Time        | Time between initial contacts of two consecutive footfalls from the same foot                                         |
| Swing Time         | Time between the final contact from the current footfall to the initial contact of the next footfall on the same foot |
| Step Time          | Time between initial contact from one foot to the initial contact of the opposite foot                                |
| Single Support     | The elapsed time while a single foot is in contact with the ground and the opposite foot is in the air                |
| Double Support     | Time elapsed while both feet are in contact with ground                                                               |
| Gait Cycle         | Time between initial contacts from two consecutive footfalls of the same foot                                         |
| Initial Contact    | Time when a foot first makes contact with floor                                                                       |
| Final Contact      | Time when a foot last makes contact with floor                                                                        |

---

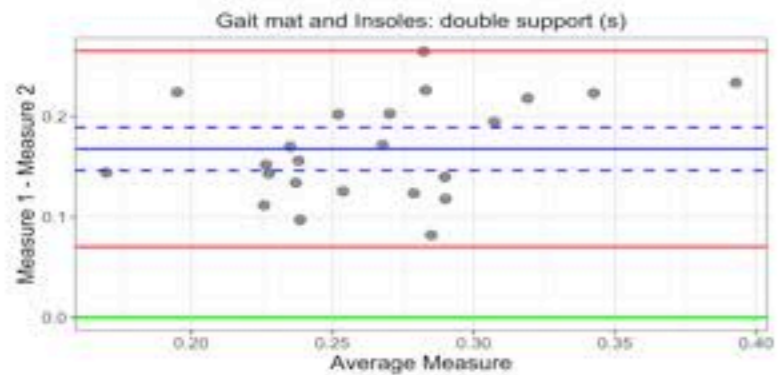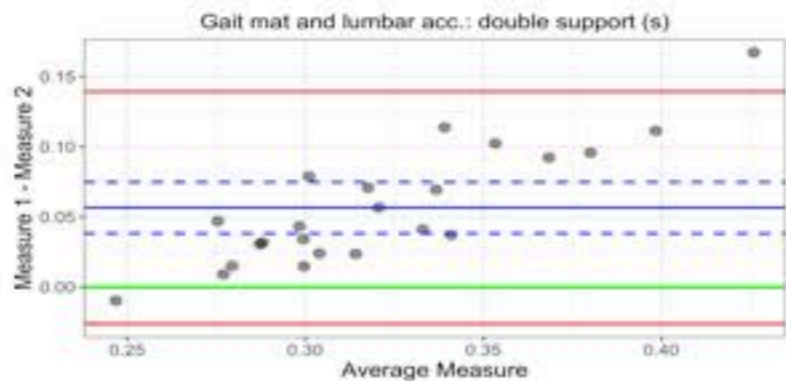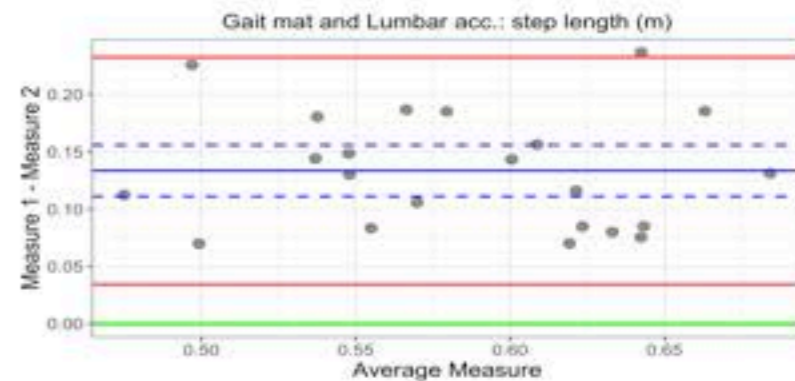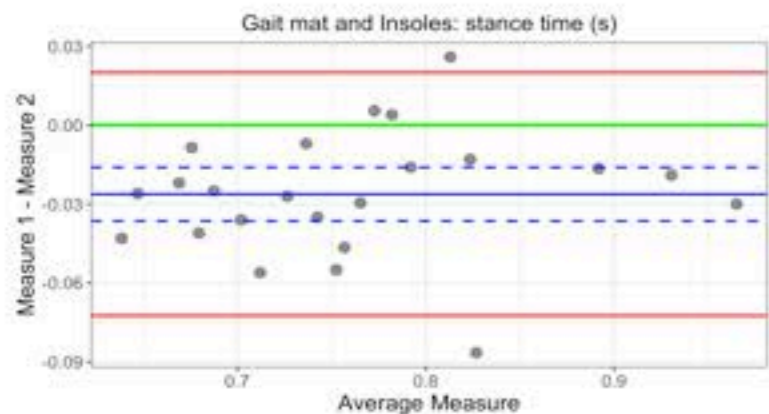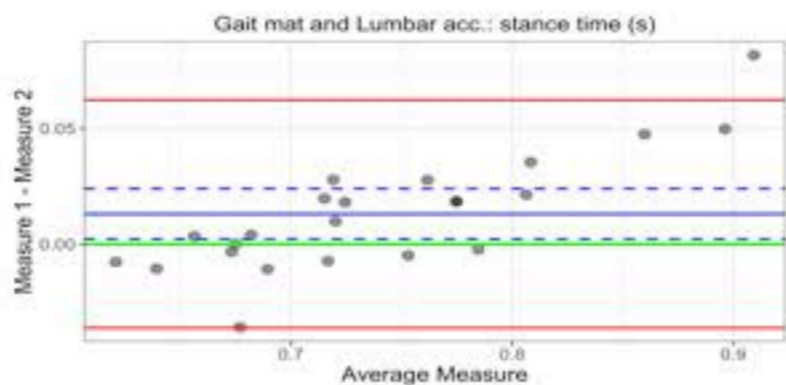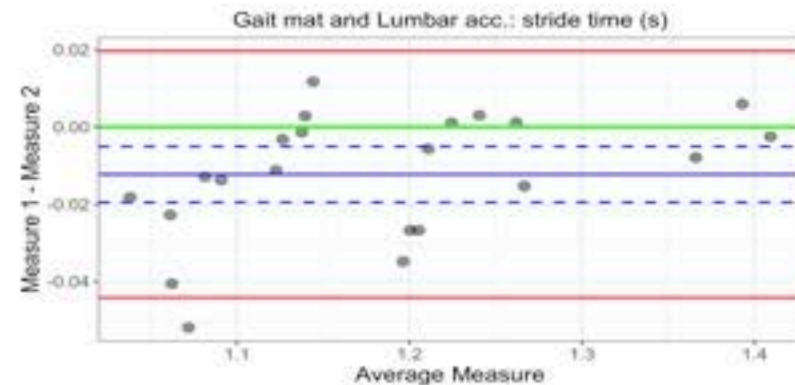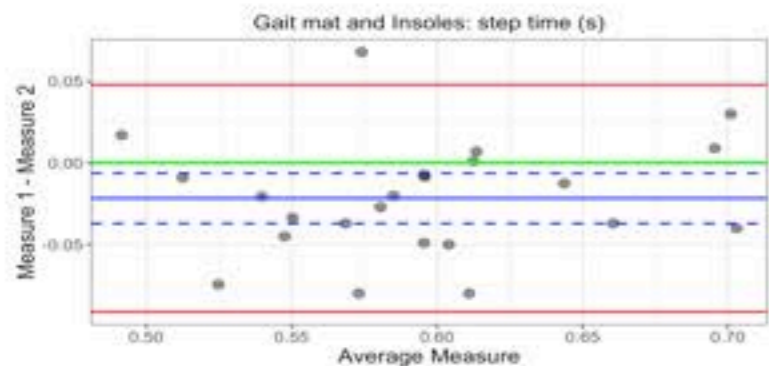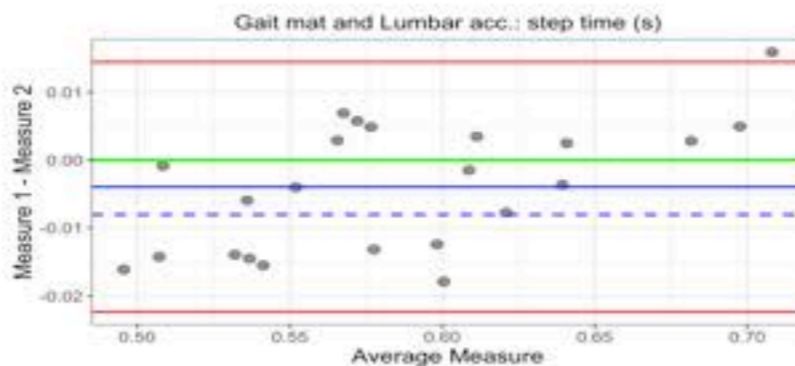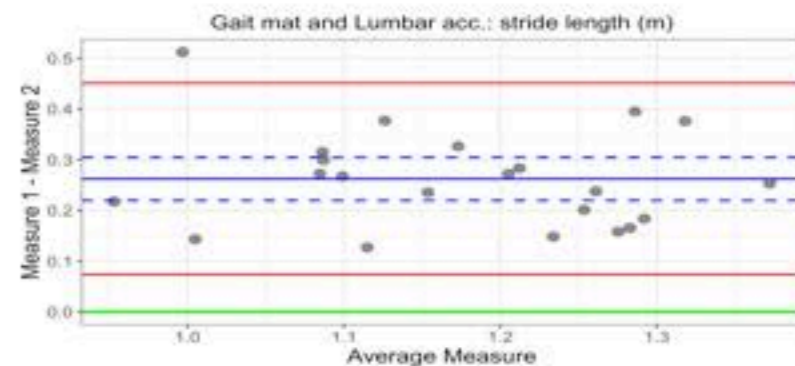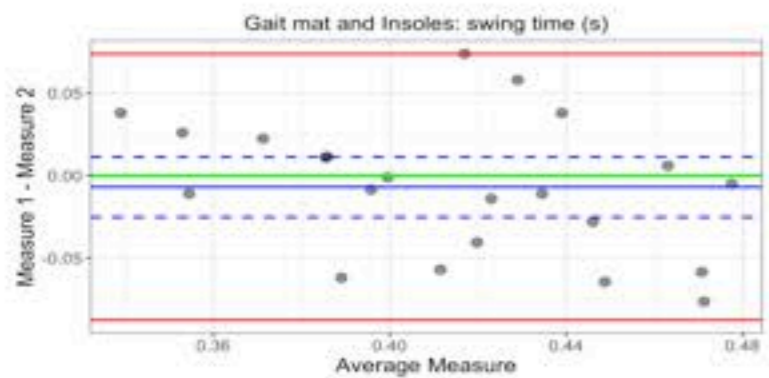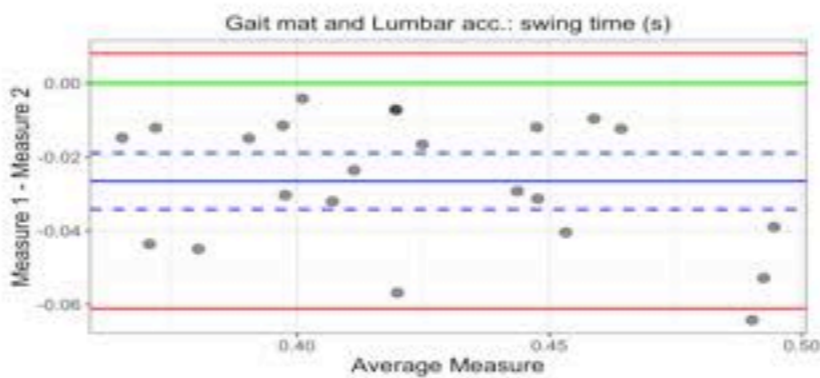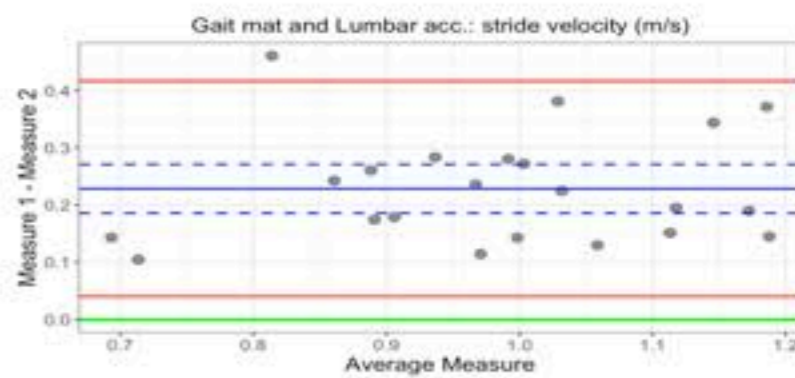



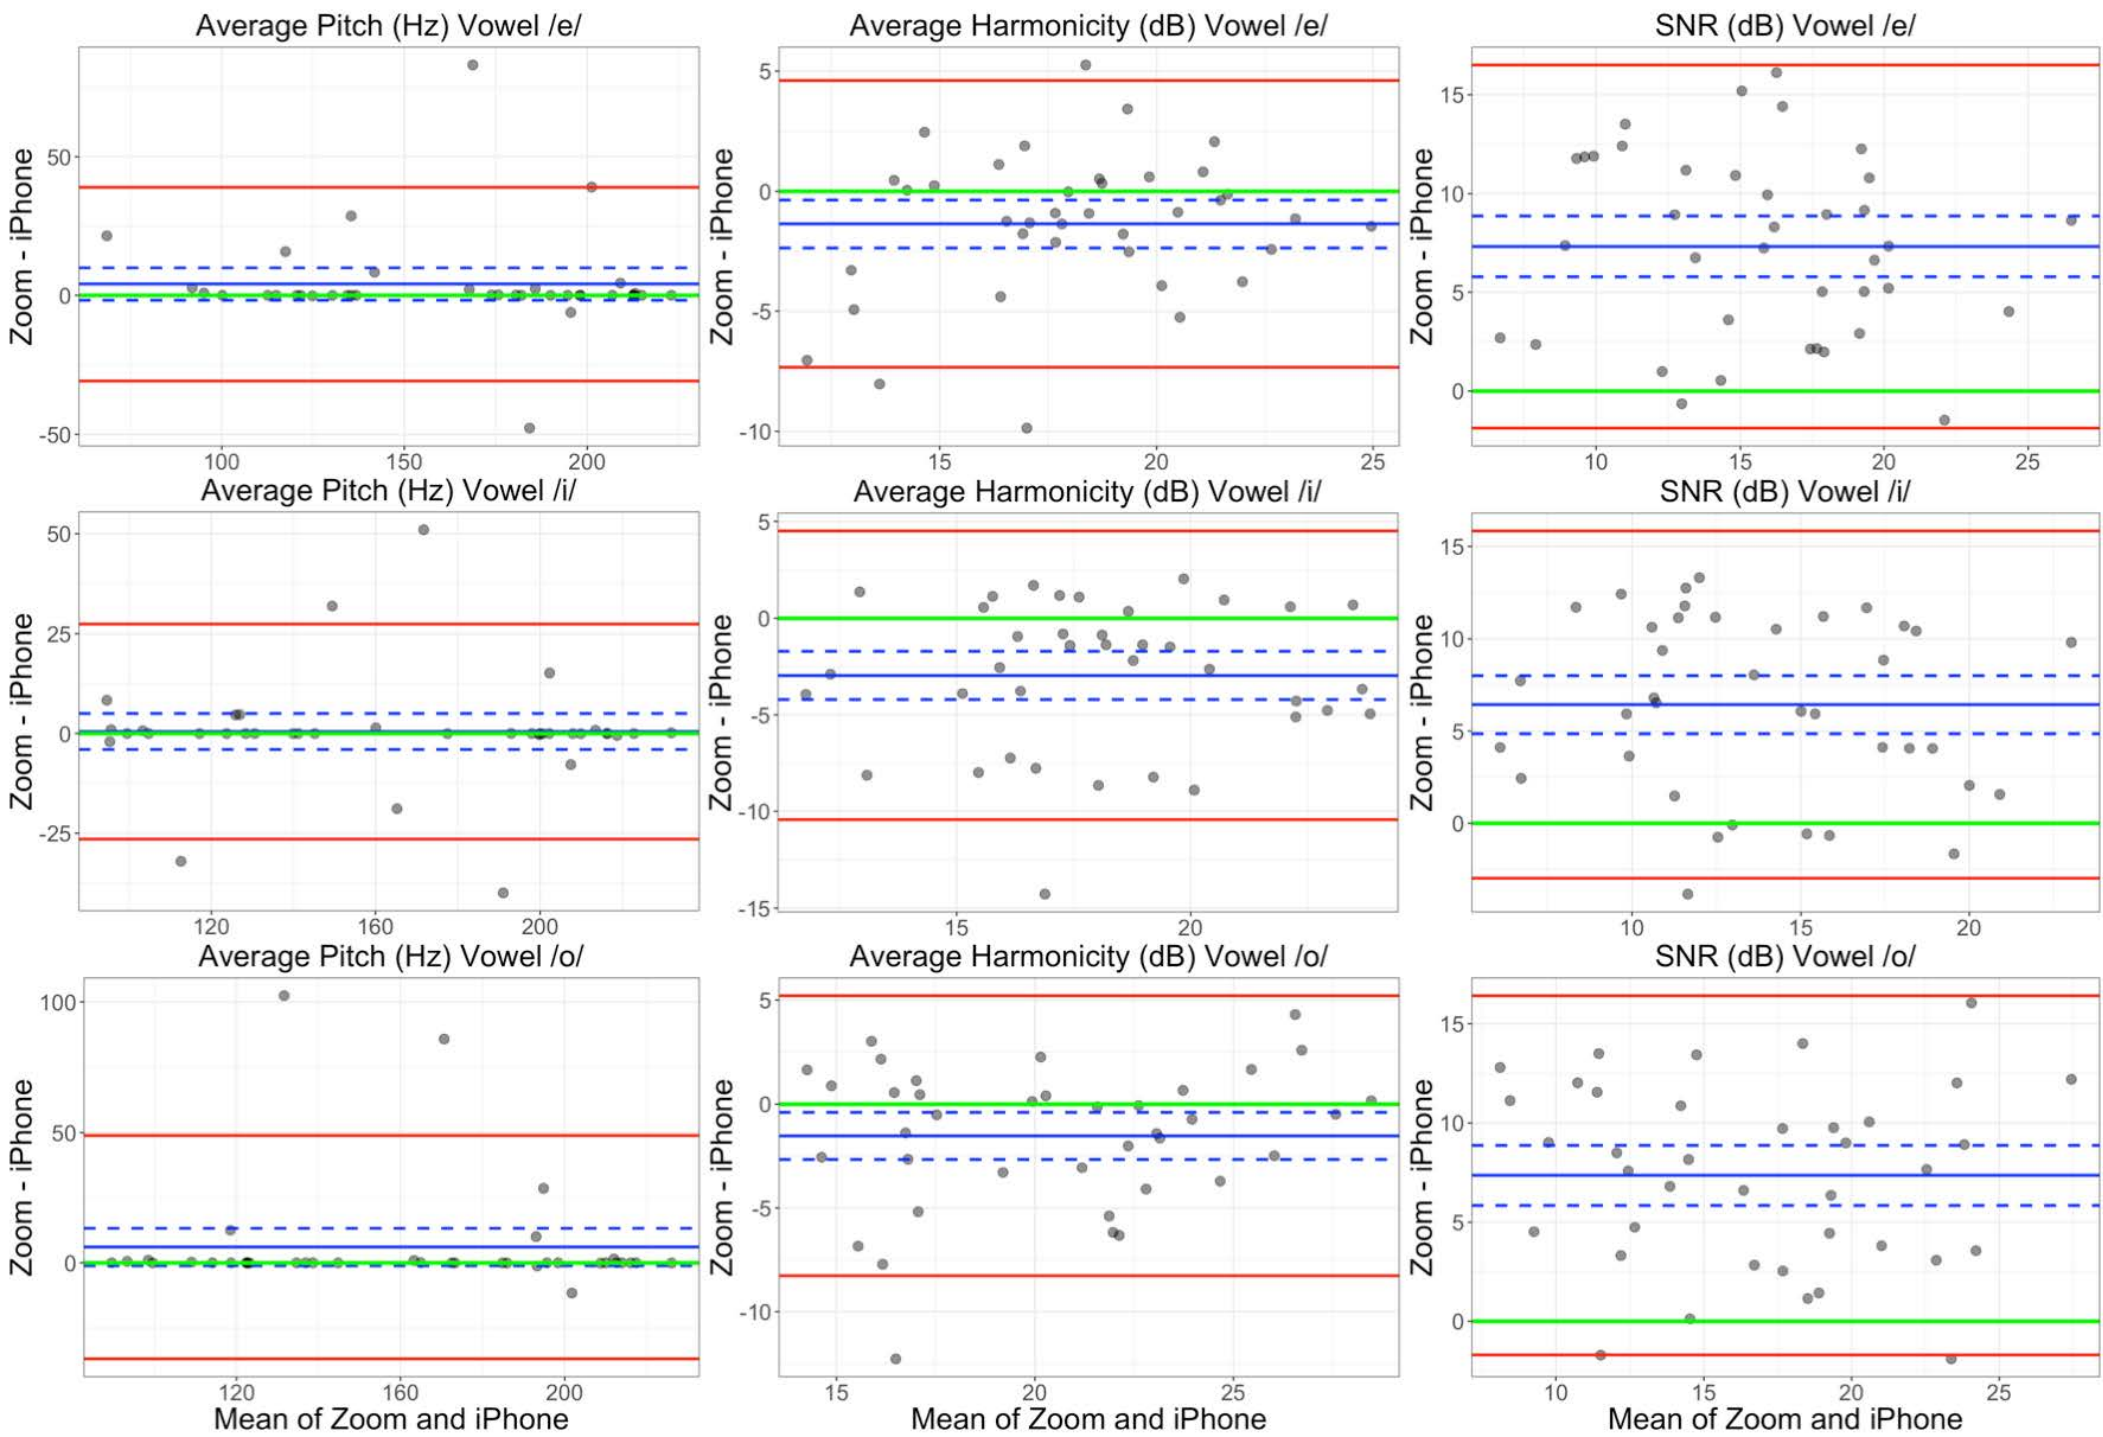

Supplemental Figure 1: Demographic data.

Supplemental Figure 2: Wearable device layout.

Supplemental Figure 3: Gait metric definitions.

Supplemental Figure 4: Bland-Altman comparison of insole and lumbar accelerometer gait metrics against gait mat.

Supplemental Figure 5: Bland-Altman comparison of average pitch, harmonicity, and SNR values across sustained vowels between Zoom and iPhone.
